# Supplementary material
Source: PubMed Central journal article supplement (PMC4850516)
Supplement: oc6b00066_si_001.pdf [file oc6b00066_si_001.pdf]

Supporting Information for

## Extraction of Lanthanide and Actinide Ions from Aqueous Mixtures Using a Carboxylic Acid-Functionalized Porous Aromatic Framework

Selvan Demir,<sup>a,c,‡</sup> Nicholas K. Brune,<sup>a,c,‡</sup> Jeffrey F. Van Humbeck,<sup>a,1</sup> Jarad A. Mason,<sup>a</sup> Tatiana V. Plakhova,<sup>c,f</sup> Shuao Wang,<sup>a,c,2</sup> Guoxin Tian,<sup>c,h</sup> Stefan G. Minasian,<sup>c</sup> Tolek Tyliczszak,<sup>e</sup> Tsuyoshi Yaita,<sup>g</sup> Tohru Kobayashi,<sup>g</sup> Stepan N. Kalmykov,<sup>f</sup> Hideaki Shiwaku,<sup>g</sup> David K. Shuh,<sup>c</sup> Jeffrey R. Long<sup>a,b,d,\*</sup>

<sup>a</sup>Departments of Chemistry and <sup>b</sup>Chemical and Biomolecular Engineering, University of California, Berkeley, CA 94720, USA

<sup>c</sup>Chemical Sciences Division, <sup>d</sup>Materials Sciences Division, and <sup>e</sup>Advanced Light Source, Lawrence Berkeley National Laboratory, Berkeley, CA 94720 USA

<sup>f</sup>Chemistry Department, Lomonosov Moscow State University, Leninskie Gory, Moscow 11991, Russia

<sup>g</sup>Actinide Chemistry Group, Energy and Environment Science Division, Quantum Beam Science Center, Japan Atomic Energy Agency, 1-1-1 Kouto, Sayo-cho, Sayo-gun, Hyogo 679-5148, Japan

<sup>h</sup>Radiochemistry Department, China Institute of Atomic Energy, Beijing 102413, China.

*ACS Central Science*

## Table of Contents

|                                                                                                        |    |
|--------------------------------------------------------------------------------------------------------|----|
| <b>Figure S1.</b> IAST: Amounts Adsorbed from 0.1 and 1 mM Nd <sup>3+</sup> /Fe <sup>3+</sup> mixture  | 3  |
| <b>Figure S2.</b> IAST: Amounts Adsorbed from 0.1 and 1 mM Sr <sup>2+</sup> /Fe <sup>3+</sup> mixture  | 4  |
| <b>Figure S3.</b> IAST: Amounts Adsorbed from 0.1 and 1 mM Nd <sup>3+</sup> /Sr <sup>2+</sup> mixture  | 5  |
| <b>Figure S4.</b> a) K-edge XANES spectra<br>b) Schematic of possible Nd interactions with BPP-7.      | 6  |
| <b>Figure S5.</b> XAFS Fitting Details                                                                 | 7  |
| <b>Figure S6.</b> Carbon K-edge for Nd-BPP-7                                                           | 8  |
| <b>Figure S7.</b> Oxygen K-edge for Nd-BPP-7                                                           | 8  |
| <b>Figure S8.</b> Nd M <sub>5,4</sub> -edge for Nd-BPP-7                                               | 8  |
| <b>Figure S9.</b> Infrared spectrum of the unloaded BPP-7 and the neodymium-loaded combustion product. | 9  |
| <b>References</b>                                                                                      | 10 |

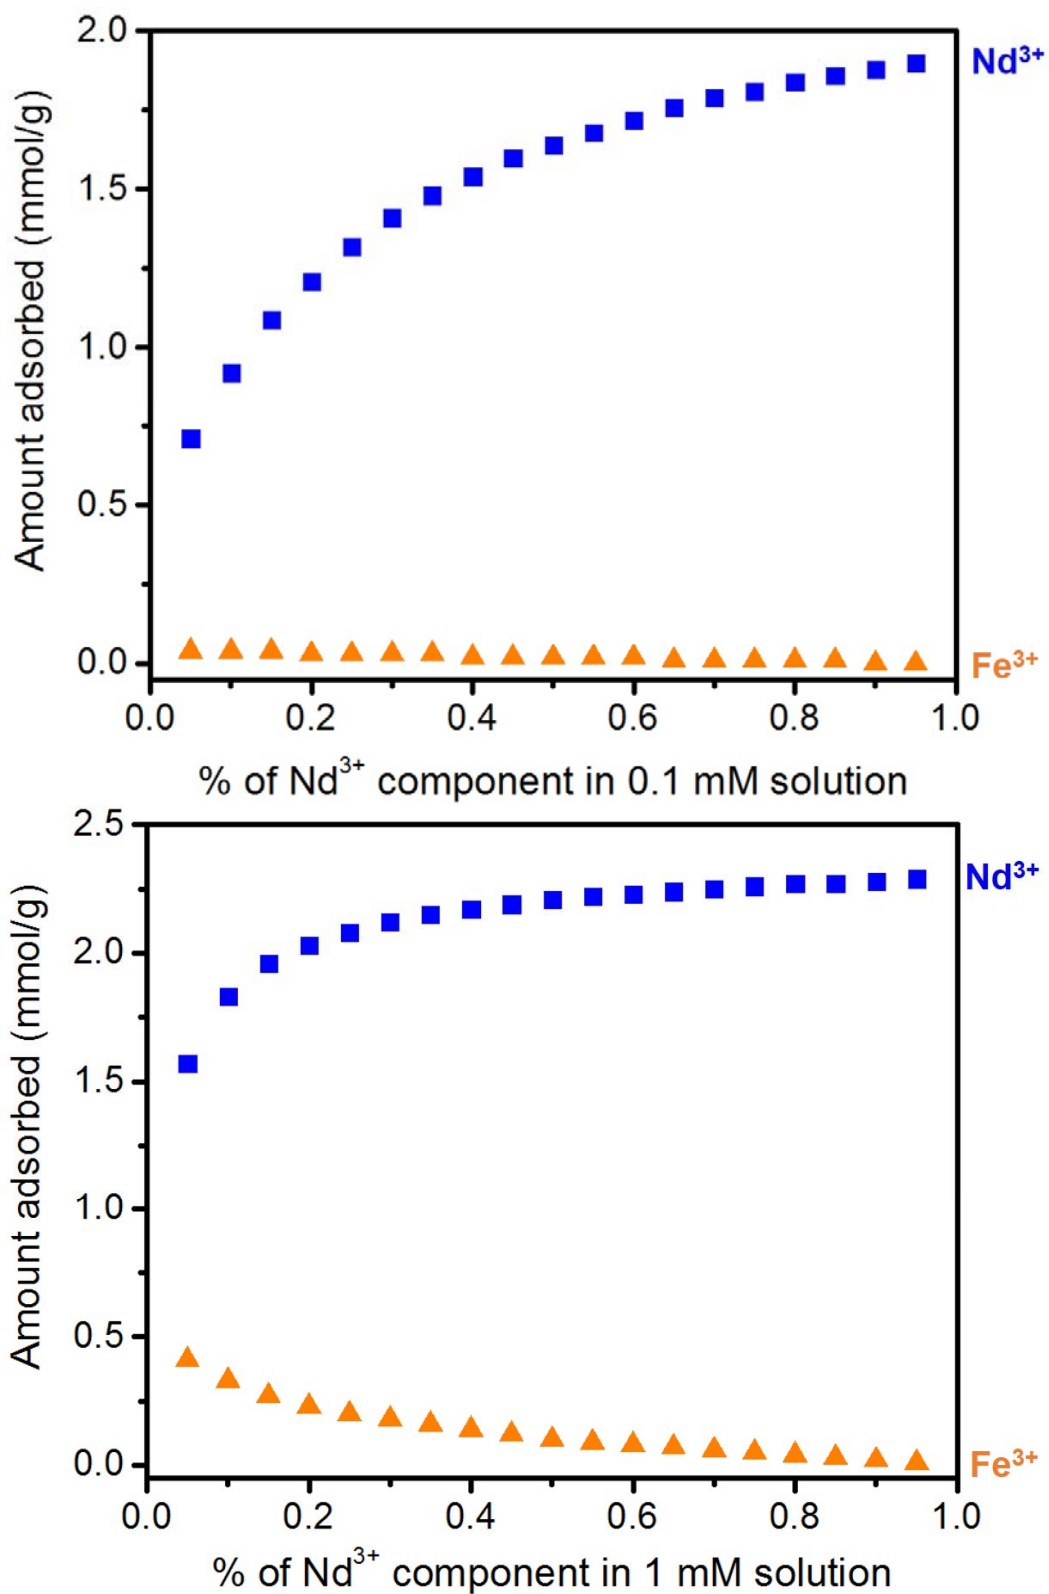

**Figure S1.** Ideal adsorbed solution theory (IAST): Amounts adsorbed from 0.1 mM (top) and 1 mM (bottom) Nd<sup>3+</sup>/Fe<sup>3+</sup> mixtures (Nd<sup>3+</sup> = blue squares; Fe<sup>3+</sup> = orange triangles).

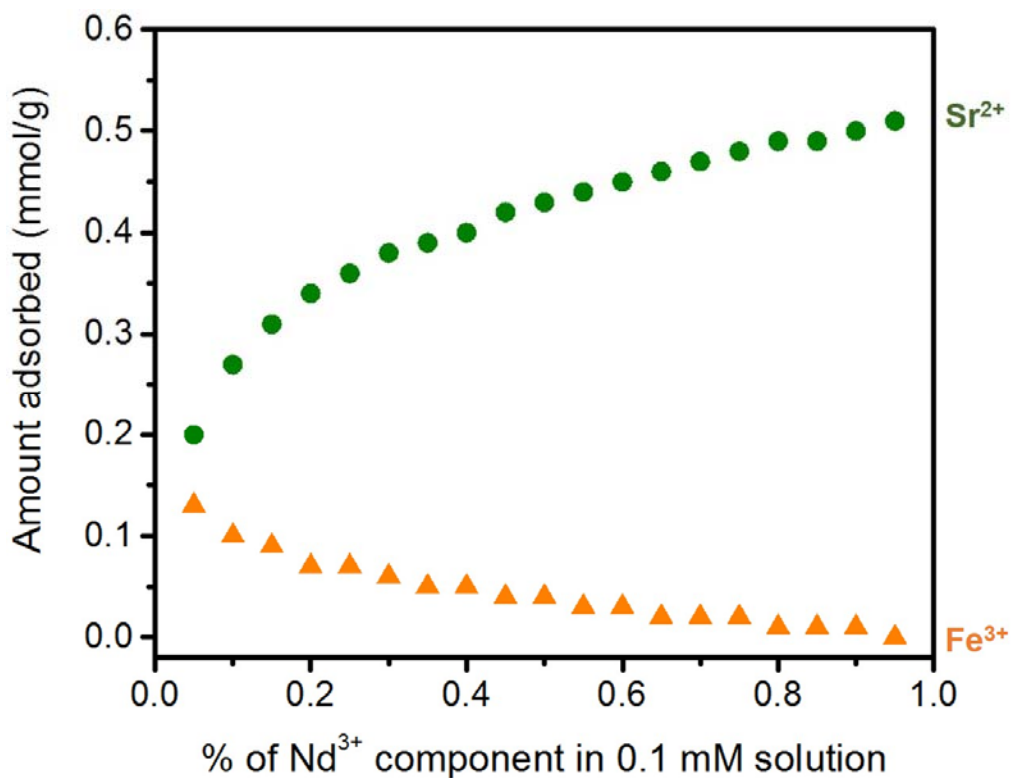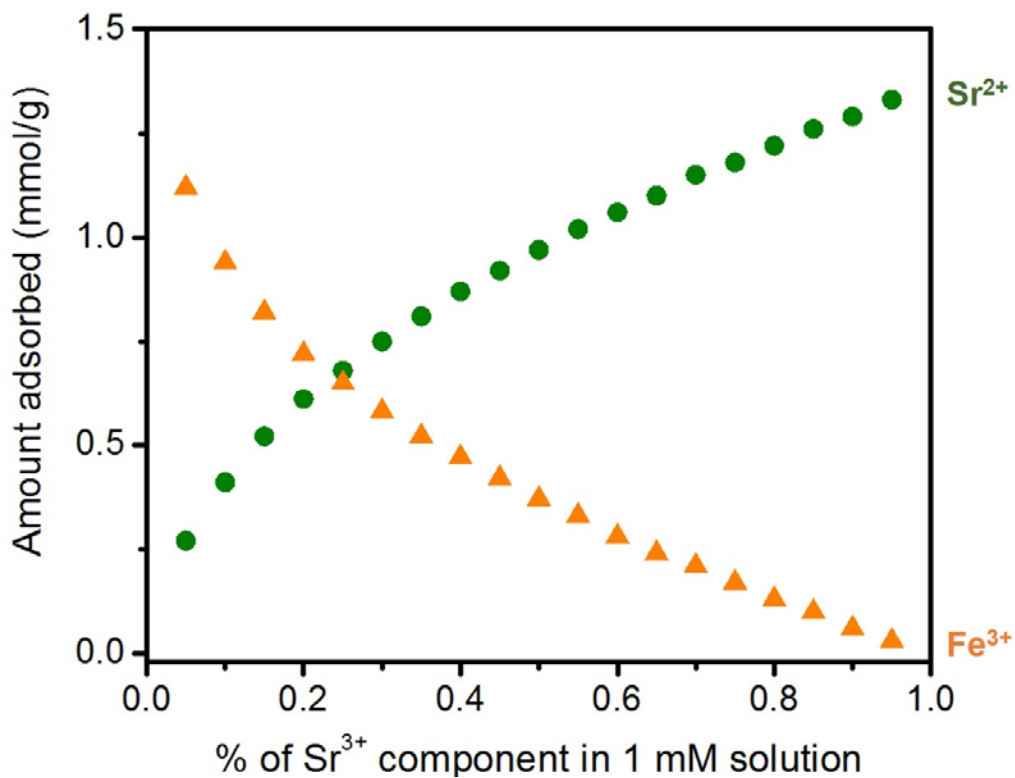

**Figure S2.** Ideal adsorbed solution theory (IAST): Amounts Adsorbed from 0.1 mM (top) and 1 mM (bottom)  $\text{Sr}^{2+}/\text{Fe}^{3+}$  mixtures ( $\text{Sr}^{2+}$  = green circles;  $\text{Fe}^{3+}$  = orange triangles).



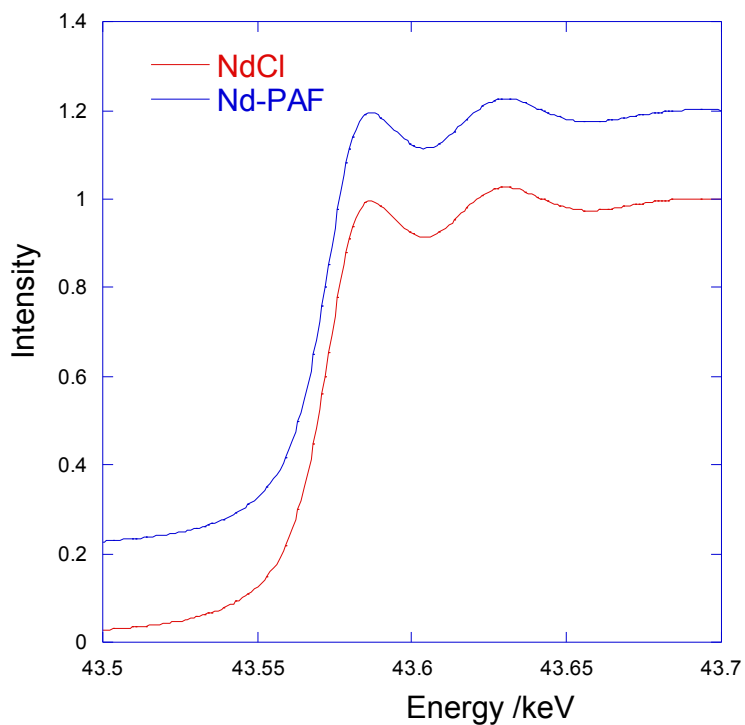

**a**

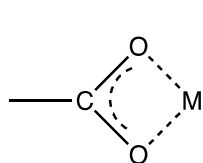

Bidentate  
M-O<sub>1</sub>: ~2.42 Å

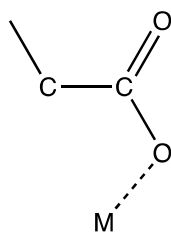

Monodentate  
M-O<sub>1</sub>: ~2.48 Å (range 2.43-2.53 Å)

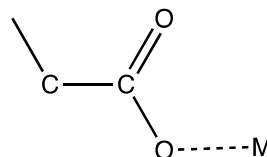

OH<sub>2</sub>----M  
Hydrated  
M-O<sub>1</sub>: ~2.48 Å

**b**

**Figure S4.** (a) Comparison of the K-edge XANES spectra collected from the Nd-BPP-7 and an aqueous neodymium(III) chloride solution (NdCl) that confirms the oxidation state of Nd in the Nd-BPP-7 as trivalent. (top) (b) Schematic of possible Nd interactions with BPP-7. Distances are from Ref.<sup>1-4</sup> (bottom)

## XAFS Fitting Details

The parameters for the back scattering factors and phase shift were calculated Feff8.0 code.<sup>5</sup> The input file for the Feff calculation was prepared based on the model compound shown in Fig. S5: derived from SRef.<sup>6</sup> Since the coordination site for Nd is the carboxylate group, the nearest oxygen parameter calculated was utilized for the first shell fitting; and as a result, that the M-O bond distance as 2.48 Å was successfully obtained.

The residual second shell fitting was performed by the parameter of carbon or oxygen located around 3 Å, and then could obtain the bond distance about 3.3 Å and relatively large Debye-Waller factor of about 0.02. During all the fittings, the coordination number (N), Debye-Waller factor (DWF), and damping factor ( $S_0$ ) were constrained from 6-12, 0.001-0.1 Å<sup>2</sup>, and 0.8-1, respectively.

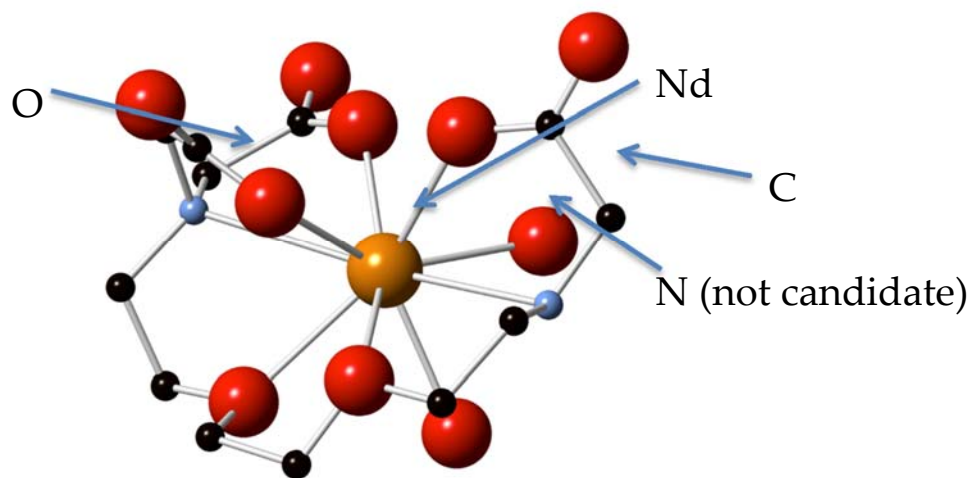

**Figure S5.** Model compound for calculation of the EXAFS fitting parameters.<sup>6</sup>

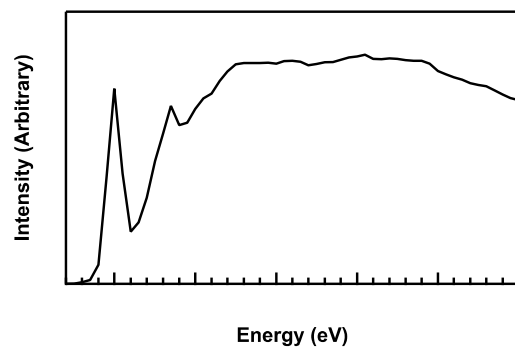

**Figure S6.** Carbon K-edge for Nd-BPP-7

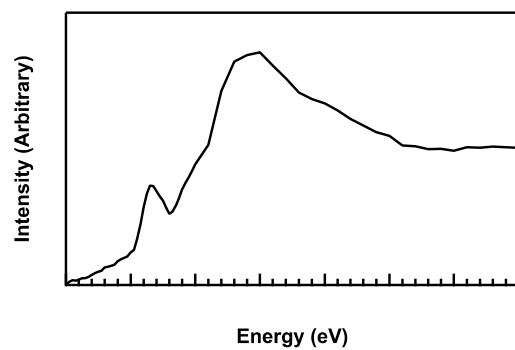

**Figure S7.** Oxygen K-edge for Nd-BPP-7

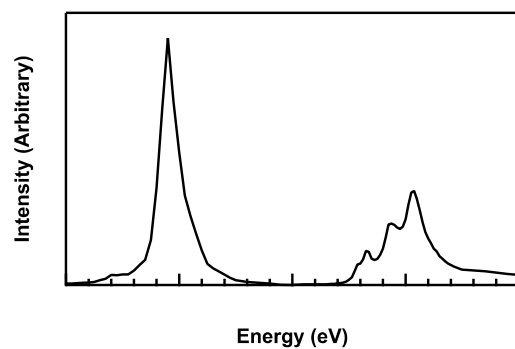

**Figure S8.** Nd  $M_{5,4}$ -edge for Nd-BPP-7



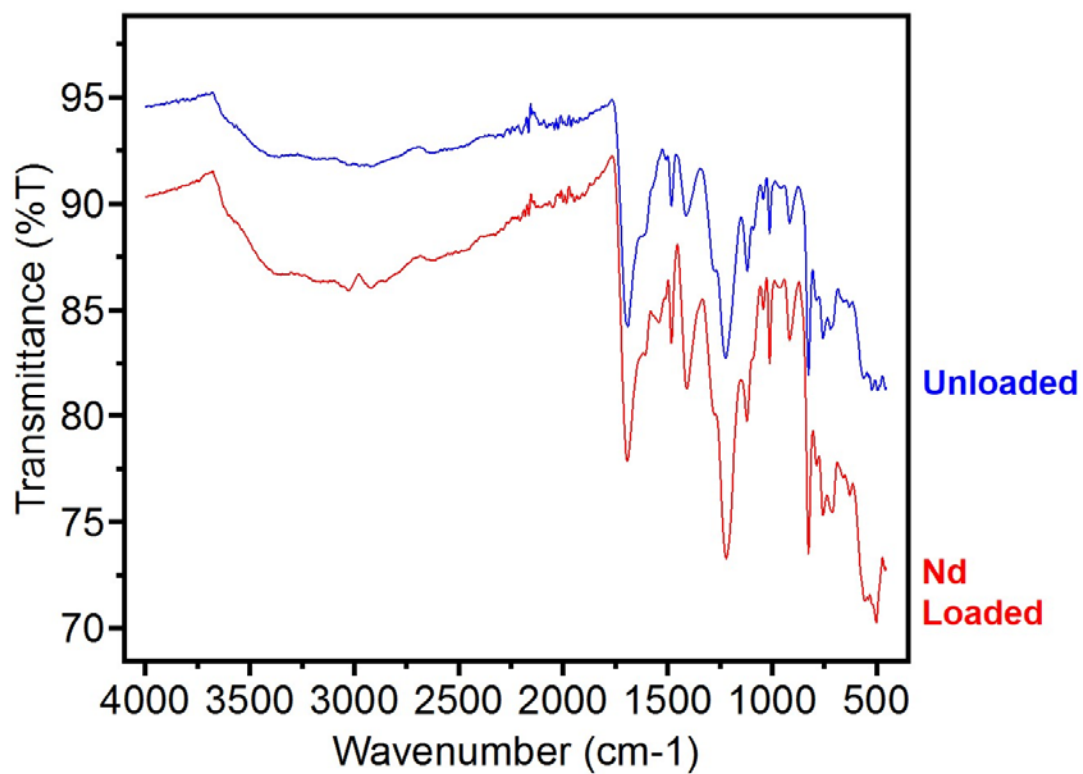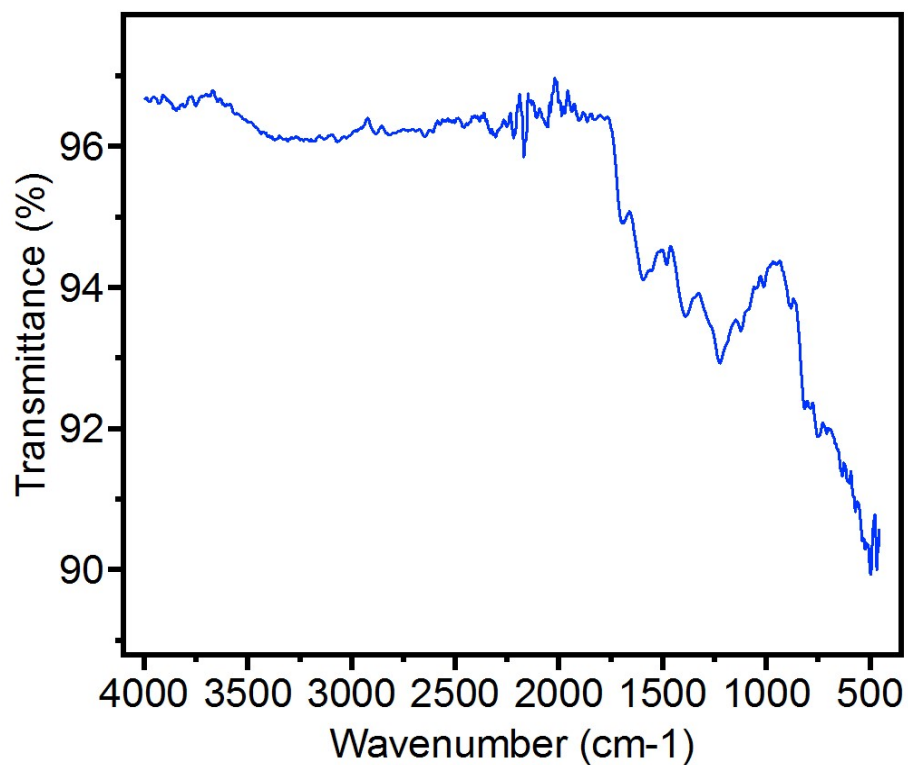

**Figure S9.** Top: Infrared spectrum of the unloaded BPP-7 (blue) and the neodymium-loaded BPP-7 (red). Bottom: Neodymium-loaded combustion product (blue).

## References

1. Tang, X.; Yue, S.; Li, P.; Wang, N.; Liu, Y. Hydrothermal synthesis and crystal structure study of two novel 3-D mellitates  $\{\text{Nd}_2[\text{C}_6(\text{COO})_6](\text{H}_2\text{O})_6\}$  and  $\{\text{Ho}_2[\text{C}_6(\text{COO})_6](\text{H}_2\text{O})_6\}$ . *J. Rare Earth* **2008**, *26*, 800-803.
2. Huskowska, E.; Legendziewicz, J.; Schleid, T.; Meyer, G. A Special Double Issue Devoted to the Workshop on the Basic and Applied Aspects of Rare Earths do the Lanthanides Form Inner Sphere Complexes with  $\text{ClO}_4^-$  Ions in Competition with  $\text{H}_2\text{O}$  Molecules? *Mater. Chem. Phys.* **1992**, *31*, 117-122.
3. Csoregh, I.; Huskowska, E.; Ertan, A.; Legendziewicz, J.; Kierkegaard, P. Crystal Structure of a Novel Neodymium Hydroxide Perchlorate Hydrate,  $\text{Nd}_2(\text{OH})_3(\text{ClO}_4)_3 \cdot 5\text{H}_2\text{O}$ . *Acta Chem. Scand.* **1989**, 829-833.
4. Mondry, A.; Starynowicz, P. Crystal Structure and Absorption Spectroscopy of a Neodymium(III) Complex with Triethylenetetraaminehexaacetic Acid,  $\text{Na}_3[\text{Nd}(\text{TTHA})] \cdot 2.5\text{NaClO}_4 \cdot 7.617\text{H}_2\text{O}$ . *Inorg. Chem.* **1997**, *36*, 1176-1180.
5. Ankudinov, A. L.; Rehr, J. J. Theory of solid-state contributions to the X-ray elastic scattering amplitude. *Phys. Rev. B* **2000**, *62*, 2437-2445.
6. Schauer, C. K.; Anderson, O. P. Highly polydentate ligands. Part 4. Crystal structures of neodymium(III) and erbium(III) complexes of 3,12-bis(carboxymethyl)-6,9-dioxa-3,12-diazatetradecanedioate(4-). *J. Chem. Soc., Dalton Trans.* **1989**, 185-191.
